# Supplementary material for: Metabolome Shift in Both Metastatic Breast Cancer Cells and Astrocytes Which May Contribute to the Tumor Microenvironment
Source: Int J Mol Sci. 2021 Jul 11;22(14):7430. doi: 10.3390/ijms22147430 (PMC8308096; doi:10.3390/ijms22147430)
Supplement: Supplementary file 1 [file ijms-22-07430-s001.zip]

Archive with 8 entries (8 files):
- supplmentary FigS1.pdf
- Table S1_Astrocyte metabolites for statistics.csv
- Table S2_astro volcano_results.xlsx
- Table S3_astro pathway_results(compound name).xlsx
- Table S4_Arginine proline metabolism.xlsx
- Table S5_MDA231 metabolites for statistics.csv
- Table S6_MDA231 heatmap and PCA.xlsx
- Table S7_MDA231 pathway_results.xlsx
