# Supplementary material for: Metabolome Shift in Both Metastatic Breast Cancer Cells and Astrocytes Which May Contribute to the Tumor Microenvironment
Source: Int J Mol Sci. 2021 Jul 11;22(14):7430. doi: 10.3390/ijms22147430 (PMC8308096; doi:10.3390/ijms22147430)
Supplement: Supplementary file 1 [file ijms-22-07430-s001.zip › Table S1_Astrocyte metabolites for statistics.csv]

	group	Glycolic acid	cGMP	cAMP	Gluconic acid	GMP	IMP	CMP	UMP	Glucose 6-phosphate	Glucose 1-phosphate	Fructose 6-phosphate	3-Hydroxybutyric acid	2-Hydroxybutyric acid	Acetyl-CoA	2-Oxoisovaleric acid	ADP	Lactic acid	dTDP	GTP	UDP	ATP	CTP	Fructose 1,6-diphosphate	Ribose-5-Phosphate	6-Phosphogluconic acid	PRPP	2-Phosphoglyceric acid	Citric acid	Fumaric acid	Isocitric acid	3-phosphoglyceric acid	AMP	dTMP	Sedoheptulose-7-phosphate	GDP	CDP	Glycerophosphorate	dATP	Malonyl CoA	dTTP	Dihydroxyacetone phosphate	dCTP	UTP	Succinic acid	Malic acid	Phosphoemolpyruvic acid	Aconitic acid	Glyoxylic acid
astrocyte_1	1	219.5931299	13.37046946	15.36541519	17.00252444	6.994617427	12.90264135	11.86563447	9.939742702	12.33777145	11.72419396	10.60321629					35.98098858	915.0041037	1.721272913	36.4992599	5.980259361	216.3241388	6.373551321	8.595254688					30.59277838		35.43896005		15.27802936		10.11788116	19.24989567	5.75449634	16.14382101						34.55421349	14.63846867	26.95312537		6.775561199	502.5261804
astrocyte_2	1	133.0517761	9.676303171	10.83242717	14.67791462	4.341608616	7.217226557	8.018013358	6.951425246	8.459931093	8.012055588	6.817119178					23.92079452	1506.351212		22.84360448	4.12983087	148.0479835	4.293577021	6.271102142					30.5631997		32.36593118		9.241007338		8.010084667	13.28951986	4.147853223	12.18353902						24.20004219	10.77285585	19.48735795		5.281889183	962.8190706
astrocyte_3	1	13.01288869	1.062354929	1.421018686	3.648282529	2.426474349	2.609536014	2.456446268	2.440679947	1.553152961	1.529360735	1.410293372		0.417705553		0.524917178	2.353409666	674.5980155	0.150904275		0.664804698			0.698066232				0.336387659	0.892714754		0.43422449		10.61199504	0.631050009	2.840166153	1.825936006		0.656148164							4.025512428	1.084687984			15.4210692
astrocyte_4	1	32.43459643		3.377307139	4.587180006	1.988962968	2.78473364	3.14016181	3.767638232	10.14120933	3.832218647	3.755887341				0.057859945	6.818570922	621.0801491			1.252611378	6.092054564						0.776297593	1.082564117		0.163669117		10.54126361		4.927556608	3.672339171								2.181032834	4.661760599	2.21575658			166.9551342
astrocyte+MDAmedium_1	2	172.5866159	10.41562348	11.71571654	19.0830406	5.317861166	9.517174073	9.449860509	8.052177273	7.081517801	8.593173066	7.167324227		1.213181978			38.84038729	110.1121571		30.1764532	6.325301807	185.064833	6.614626533	6.753100286							35.11848652		11.83260369		9.142913376	16.78046338	4.629017455	11.06965681						31.0543387	25.42111101	25.8388986
astrocyte+MDAmedium_2	2	59.27338651	4.161477117	7.653585969	7.98350583	2.833186302	10.14997486	4.535737054	5.081179506	3.78338449	3.506612903	2.797319654		1.682498635			18.05864077	2861.50628		7.024710277	3.27591808	55.82262666	0.454890879	2.758826338						0.387041451	10.09574369		10.77243721		5.548591659	7.093179274	1.733787984	5.127018681						9.748409997	10.79352189	17.49213789	6.079730936
astrocyte+MDAmedium_3	2	81.38500947	5.636595992	9.447079169	9.868703985	3.521055489	10.46300626	6.313413145	5.735276757	5.349432149	4.580920952	3.880580167	23.98891619	17.32801771		0.848400047	22.71224192	76.23989702		10.00778703	2.864960862	79.29412897	0.95065319	3.584282731					15.09139464	3.345824583	14.64486016		13.09050324		6.150104726	8.890367236		10.23519703						11.94140511	19.21365497	14.43973687		2.775344515
astrocyte+MDAmedium_4	2	65.88417956			13.61741172	7.011135399	7.975779807	8.876360076	10.00433106	18.52409603	5.428175841	5.92838684					21.96828888	385.6760673			6.889624865	11.48683372		3.061288085					4.520969252		2.370975004		32.34756717		11.65059287	12.21451877		2.969676493						4.370841792	10.11320323	8.005797032	6.310445173		166.5217737
astrocyte+MDAmedium_5	2	82.58696427		5.714695412	9.149818453	10.88663324	9.407173321	9.841511635	11.51870881	12.69485442	12.16846412	7.479252396				0.191967394	15.87937628	816.7135184			3.282107769	5.46210463		3.003556991				1.322987595	2.61944745	0.555603853			41.32896339		9.323273509	10.94315073	1.914699922							4.250230457	12.0805192	7.586880687
astrocyte+MDAmedium_6	2	143.2187785		10.76605562	16.85917912	14.31836619	13.89070011	12.19335213	14.72095923	10.59577135	11.48100055	6.608410237					14.00209395	2658.440172			3.906489422	0.125239797		5.095214249				2.276245249	9.223046208	0.622833829	3.163010749		50.48385808		12.26733925	13.3333992								6.845842329	14.31062745	9.896929918
[truncated: 57 more columns]
