# Supplementary material for: Metabolome Shift in Both Metastatic Breast Cancer Cells and Astrocytes Which May Contribute to the Tumor Microenvironment
Source: Int J Mol Sci. 2021 Jul 11;22(14):7430. doi: 10.3390/ijms22147430 (PMC8308096; doi:10.3390/ijms22147430)
Supplement: Supplementary file 1 [file ijms-22-07430-s001.zip › Table S2_astro volcano_results.xlsx]

## Sheet: astro volcano_results
＃		FC	log2(FC)	raw.pval	-LOG10(raw.pval)
1	Spermidine	5.3477	2.4189	0.00045018	3.3466
2	Adenosine	4.4361	2.1493	0.027368	1.5628
3	Guanosine	4.4137	2.142	0.028332	1.5477
4	Glycine	2.5729	1.3634	0.025934	1.5861
5	Ornithine	2.0512	1.0365	0.028462	1.5457
6	Homoserine	2.0267	1.0191	0.025202	1.5986
7	Lysine	2.015	1.0108	0.027498	1.5607
8	Glyoxylic acid	0.073614	-3.7639	0.054374	1.2646
	#Number coresponds to Fig.2A.
