# Supplementary material for: Metabolome Shift in Both Metastatic Breast Cancer Cells and Astrocytes Which May Contribute to the Tumor Microenvironment
Source: Int J Mol Sci. 2021 Jul 11;22(14):7430. doi: 10.3390/ijms22147430 (PMC8308096; doi:10.3390/ijms22147430)
Supplement: Supplementary file 1 [file ijms-22-07430-s001.zip › Table S3_astro pathway_results(compound name).xlsx]

## Sheet: pathway_results
Pathway	Total	Expected	Hits	Raw p	-log(RawP)	Holm adjust	FDR	Impact	(-log(RawP))*Impact
Arginine and proline metabolism	38	0.29419	5	4.7326e-06	5.3249	0.00039754	0.00039754	0.27835	1.48219
Glycine, serine and threonine metabolism	33	0.25548	3	0.0016988	2.76986	0.1359	0.02854	0.46284	1.282
Glyoxylate and dicarboxylate metabolism	32	0.24774	3	0.0015512	2.80933	0.12564	0.02854	0.42328	1.18913
Aminoacyl-tRNA biosynthesis	48	0.37161	5	1.5535e-05	4.80869	0.0012894	0.00065249	0.16667	0.801464
Glutathione metabolism	28	0.21677	3	0.0010427	2.98184	0.085502	0.02854	0.10311	0.307458
Purine metabolism	65	0.50323	3	0.011808	1.92782	0.93286	0.16532	0.06541	0.126099
Arginine biosynthesis	14	0.10839	1	0.10351	0.985018	1	1	0.07614	0.0749992
Cysteine and methionine metabolism	33	0.25548	1	0.22831	0.641475	1	1	0.02184	0.0140098
Primary bile acid biosynthesis	46	0.35613	1	0.30429	0.516712	1	1	0.00758	0.00391668
Biotin metabolism	10	0.077419	1	0.074988	1.12501	1	0.89985	0	0
beta-Alanine metabolism	21	0.16258	1	0.1515	0.819587	1	1	0	0
Sphingolipid metabolism	21	0.16258	1	0.1515	0.819587	1	1	0	0
Lysine degradation	25	0.19355	1	0.17785	0.749946	1	1	0	0
Porphyrin and chlorophyll metabolism	30	0.23226	1	0.20973	0.678339	1	1	0	0
