# Supplementary material for: Metabolome Shift in Both Metastatic Breast Cancer Cells and Astrocytes Which May Contribute to the Tumor Microenvironment
Source: Int J Mol Sci. 2021 Jul 11;22(14):7430. doi: 10.3390/ijms22147430 (PMC8308096; doi:10.3390/ijms22147430)
Supplement: Supplementary file 1 [file ijms-22-07430-s001.zip › Table S4_Arginine proline metabolism.xlsx]

## Sheet: Arginine-Proline metabolism
KEGG Entry	compound	Importance
C00077	L-Ornithine; (S)-2,5-Diaminovaleric acid; (S)-2,5-Diaminopentanoic acid; (S)-2,5-Diaminopentanoate	0.11063
C00134	Putrescine; 1,4-Butanediamine; 1,4-Diaminobutane; Tetramethylenediamine; Butane-1,4-diamin	0.10868
C01165	L-Glutamate 5-semialdehyde	0.09382
C03912	(S)-1-Pyrroline-5-carboxylate	0.089092
C00025	L-Glutamate	0.086
C00148	L-proline	0.0778
C01157	Hydroxyproline	0.06099
C00062	L-Arg	0.05786
C05947	L-erythro-4-Hydroxyglutamate	0.04496
C00315	Spermidine; N-(3-Aminopropyl)-1,4-butane-diamine	0.03401
C00555	4-Aminobutyraldehyde	0.03401
C05946	(4R)-4-Hydroxy-2-oxoglutarate	0.02385
C00334	4-Aminobutanoate	0.02385
C00581	Guanidinoacetate	0.02346
C02714	N-Acetylputrescine	0.02346
C00179	Agmatine	0.01407
C01137	S-Adenosylmethioninamine	0.01212
C05933	N(omega)-Hydroxyarginine	0.01212
C00300	Creatine	0.01212
C05936	N4-Acetylaminobutanal	0.01212
C03564	1-Pyrroline-2-carboxylate	0.00039
C00048	Glyoxylate	0
C05147	trans-3-Hydroxy-L-proline	0
C00763	D-Proline	0
C03440	cis-4-Hydroxy-D-proline	0
C04282	1-Pyrroline-4-hydroxy-2-carboxylate	0
C00022	Pyruvate	0
C03287	L-Glutamyl 5-phosphate	0
C00750	Spermine; N,N'-Bis(3-aminopropyl)-1,4-butanediamine	0
C00019	S-Adenosyl-L-methionine	0
C00533	Nitric oxide	0
C02305	Phosphocreatine	0
C00750	Spermine; N,N'-Bis(3-aminopropyl)-1,4-butanediamine	0
C00884	Homocarnosine	0
C01035	4-Guanidinobutanoate	0
C02946	4-Acetamidobutanoate	0
C00012	Peptide	0
