# Supplementary material for: Metabolome Shift in Both Metastatic Breast Cancer Cells and Astrocytes Which May Contribute to the Tumor Microenvironment
Source: Int J Mol Sci. 2021 Jul 11;22(14):7430. doi: 10.3390/ijms22147430 (PMC8308096; doi:10.3390/ijms22147430)
Supplement: Supplementary file 1 [file ijms-22-07430-s001.zip › Table S5_MDA231 metabolites for statistics.csv]

	group	Spermine	Spemidine	Putrescine	Carnosine	Ornithine	Lys	Choline	Arg	Cytosine	Creatinine	His	b-Ala	Adenine	GABA	Tyramine	Guanine	Gly	Creatine	Ala	Sarcosine	Cytidine	Ser	Adenosine	Val	Homoserine	Ile	Leu	Pro	N,N-Dimethylglysine	Asn	Thr	Anthranilic acid	Met	Gln	Glu	Trp	Hypoxinthine	Citrulline	Phe	Betaine	Cys	Tyr	Asp	GSSG_divalent	Hydroxyproline	Guanocine	GSH	Inosine
control1	1		47.41404153	42.34912131	53.40028883	77.48922818	191.9541417	246.4059286	124.9043482	48.23948594	38.1847351	158.1121251	1002.541949	72.51745695	284.0388002		63.24071731	2664.497298	298.9117119	1257.684135		47.04388032	499.1857453	53.12042436	415.7977912		388.6459619	466.8483443	1290.002232		194.2096008	1045.132069	47.32453076	133.5008939	3008.37643	9647.853303	105.5802801	163.9628153		256.3566145	53.36714583	51.43456683	307.6707444	2344.624734	855.4344133	55.93169886	51.52939956	7060.073769	54.33356885
control2	1		28.43354446	29.9842708	33.56311361	51.49791107	161.809917	228.6237182	104.4654907	27.72326668	22.9923584	129.8065249	871.3448753	51.35268569	262.9671347		44.93162535	2285.432747	249.2810234	1100.246393		28.09737809	412.9907577	33.65110058	364.9622949		336.1595805	424.5380548	1115.479604		151.2067616	925.7354288	27.45616848	102.7765364	2469.130116	8346.456854	79.56227191	117.8996223		211.7766983	35.22415736	34.7808546	266.3629619	2315.715089	890.2269457	34.2215646	32.17661683	6130.865857	35.52096929
control3	1		40.95908981	36.81248111	47.09502919	61.11611221	175.9978665	219.2329241	115.9163267	40.33634097	32.80804674	139.9245551	872.9496341	60.91739536	272.4737876		44.1818427	2255.548152	257.6769441	979.9895518		38.78170841	426.7907727	44.51204552	376.5850822		352.7181158	418.3875264	1159.809233		163.321126	936.1560482	39.71125944	119.8003914	2665.304903	8642.282025	90.86341247	100.7714909		217.0595939	56.11098284	45.74981099	273.9613699	2433.886962	731.0589844	45.114273	41.15085166	6881.828897	44.26893074
Glu1	2		43.02740641	35.58981701	49.48269243	68.12852554	174.752915	236.928989	115.6058161	42.77712413	36.00887225	144.2229084	928.4844727	64.6042664	259.9339801		56.83323985	2520.348418	286.8212892	1140.680519		41.45850202	449.1347253	50.13560938	404.3818917		369.4279371	473.3721363	1310.447499		179.1726877	997.4792596	42.50130273	122.7716164	2821.845068	8853.59542	96.60256733	143.152287		239.2291452	47.12228098	48.7832804	292.903937	2422.971729	763.5741772	47.71486999	46.90879006	6667.467756	48.15944432
Glu2	2		33.05536525	28.62678678	36.99537468	59.85915764	211.2797112	229.7481391	125.7886986	31.98380127	26.03098015	145.3789087	1008.522498	55.69582454	284.8966443		47.94629647	2733.976754	291.7373027	1254.098899		32.15407577	476.9440707	41.14653545	409.2910561		373.0318274	485.7544892	1379.132752		181.1881378	1102.387309	33.1665254	122.513312	2993.764994	9556.841171	91.21864328	128.6913909		239.1198398	40.96966611	39.9277958	291.633115	2479.079971	659.7963252	39.70663716	35.68639823	6922.104474	39.36429347
Glu3	2	26.86478849	32.32176333	32.09051283	33.82070335	64.71043795	236.9329717	143.168667	146.9023419	30.18234876	25.96679203	150.2923286	1115.965728	40.62399011	290.577692		42.52176695	3010.777333	327.2062358	1302.827537		30.95444123	500.8090485	38.80647104	425.4785573		387.7980324	493.040717	1433.054733		186.7968962	1109.414149	31.14921901	116.0321763	3026.367124	10289.10178	91.88053831	108.2099423		249.2410662	39.52997496	37.81706097	295.7523497	2564.60538	777.1259011	39.77450075	35.61198548	7005.626871	37.12523067
medium1	3		47.36894642	40.85115093	57.20681164	71.37530081	348.7278484	372.6170213	218.6120946	48.60742845	38.37495835	138.6565612	398.168953	166.2229945	205.6503663		85.60234406	1446.258369	275.2339781	1136.119102		46.97708744	379.7569324	59.73008748	307.5665384		260.8355215	345.5013555	1200.776443		153.3656803	794.7688835	46.21915795	106.1177091	1951.499012	8124.161767	88.95954676	129.3939317		196.7453686	61.71988164	49.82564966	218.6090383	1978.968321	652.0011832	59.72734864	50.43257957	2959.789601	52.09414366
medium2	3		46.11487886	39.65648944	57.84057504	80.21362334	337.02668	303.6242473	203.0698224	47.48815329	37.08544981	124.7739219	407.8161584	139.9782095	221.3102213		79.85873445	1412.943533	287.9209796	1000.973749		45.50668108	371.3553849	53.44366926	268.0706362		236.8802216	307.543755	1179.702062		150.3207952	754.0278768	47.20748063	95.40078425	1917.919389	7384.539213	85.76712208	115.6076694		174.0295129	59.98746711	49.55968553	204.079415	2032.112787	571.3186304	57.5060608	48.1686462	2616.495573	48.37147929
medium3	3		61.2421771	56.58103766	70.95424608	84.97118148	258.3515872	278.5374135	171.2048635	62.57527929	48.6860112	128.0896335	393.4518084	146.6167093	211.8014112		85.33772059	1368.597512	285.1207189	1030.3122		59.73480814	348.1953427	65.20067452	268.301587		242.2318498	291.4125386	1116.420884		161.3322231	663.9175572	60.54094981	103.1834425	1850.030597	7390.086754	98.239983	118.1111861	66.4009512	183.6742408	68.97162589	57.91483159	205.9153048	1871.539197	1248.689442	72.04445398	62.958163	1095.969436	62.87642037
coGlu1	4		106.9075421	85.26103066	124.1576249	129.5640962	347.7642859	364.7677931	247.4017195	110.0284081	84.64861847	167.7789527	402.6571981	116.7194577	194.7205232		99.03369256	1210.815985	235.8907007	723.3700514		105.0784996	316.7432416	114.5174292	318.0668313		287.9339613	327.8498284	680.9534678		190.1689505	594.3502472	105.2673604	148.7928304	1361.830539	4697.141584	150.2262008	217.9276189		218.9420794	93.47414415	113.4712189	237.1336665	1146.059748	591.8286131	107.8094416	117.3191314	2655.117005	125.03235
coGlu2	4		62.77050595	56.45991348	73.16398747	109.1607938	358.5399648	317.940889	227.7491164	63.70024149	49.68259019	157.6652334	546.2904291	87.93166597	231.2617191		83.46113023	1731.953102	274.6899988	934.1650496		61.38686531	407.2693969	68.27541442	350.6243395		330.986142	393.1496347	971.7252099		180.9725954	766.8809346	63.2782734	123.9935276	2104.123966	6731.445499	112.5337568	225.4427463		220.2571002	61.67149355	66.14438754	251.6307559	2089.073592	790.1615174	67.32009041	72.53542436	4869.221224	79.33634811
coGlu3	4		40.40854653	39.23692533	49.53142762	79.31524427	316.3566713	261.008352	188.9881159	40.56834096	32.70912391	135.2454612	542.2654041	76.83279384	211.7832054		68.70838683	1784.251156	257.9162866	957.6817944		39.43295725	356.4229714	45.39502361	327.4073883		283.6154368	353.7992327	1028.284079		153.4235447	713.0717895	39.8433949	97.38722661	1947.709728	6869.663944	84.29287624	174.9959613		188.022135	45.3584221	45.8502725	220.9029427	2106.539771	768.336433	46.46668726	47.01596721	4720.999435	49.58546923
coTBOA1	5	52.29408673	34.42466954	38.13677773	40.19487822	53.29840722	269.3979555	258.2378974	179.3224085	35.14716186	27.6643764	104.467898	386.4545211	43.63155451	146.9874259		49.09022752	1220.471018	169.6607629	699.6603958		34.00567248	260.1386344	40.72920295	257.5789981		220.0701943	283.4541231	656.7902268		120.4057176	610.0307906	34.85392227	80.33853627	1435.702971	4686.79389	69.24268022	151.9714183		150.7174541	39.29682015	38.51606485	172.3912865	1466.353054	643.1386087	37.73702538	44.35388997	3526.950475	64.35333062
coTBOA2	5		34.46542227	37.50483318	45.36712935	64.75462798	396.6836931	309.4630718	246.4381576	34.99019857	28.47022408	113.5273049	373.7177122	46.6365376	157.0813818		55.60456104	1264.436054	189.4005072	664.5686652		34.45323749	302.7410921	42.0860829	272.3459052		246.038502	312.893097	712.1899819		126.3386874	596.6887698	36.1338085	85.02108427	1459.453319	4929.226998	71.24715908	195.6878657		162.1948163	34.09632754	40.39457608	187.1586465	1535.538417	557.2534198	38.50628699	49.53994194	3578.257017	74.65703841
coTBOA3	5		31.69221349	35.29466571	47.48988366	50.48727988	374.6364521	285.0793296	238.0175319	32.3929274	25.77269992	104.6914114	319.3391358	50.06013292	124.5696653		50.32911585	1133.928899	153.3541028	617.156469		32.06681947	270.2641505	40.93411727	247.4142885		213.1701876	283.8370499	589.6339534		121.7494316	525.786608	33.14413529	76.50230194	1214.141842	4566.990262	65.91175648	164.9990716		145.669417	32.89444567	43.21799261	167.295541	1278.136592	464.0448491	35.65881797	42.59130515	2867.393986	56.67182095
[truncated: 60 more columns]
