# Supplementary material for: Metabolome Shift in Both Metastatic Breast Cancer Cells and Astrocytes Which May Contribute to the Tumor Microenvironment
Source: Int J Mol Sci. 2021 Jul 11;22(14):7430. doi: 10.3390/ijms22147430 (PMC8308096; doi:10.3390/ijms22147430)
Supplement: Supplementary file 1 [file ijms-22-07430-s001.zip › Table S6_MDA231 heatmap and PCA.xlsx]

## Sheet: heatmap_changed_metabolites
1	dATP
2	Guanocine
3	cAMP
4	Adenosine
5	Spemidine
6	Creatinine
7	Anthranilic acid
8	Cytosine
9	Cytidine
10	Ornithine
11	Cystein
12	2-Oxoisovaleric acid
13	Glycolic acid
14	Putrescine
15	Carnosine
16	6-Phosphogluconic acid
17	Guanine
18	Thymidine
19	Ribose-5-Phosphate
20	Uracil
21	3-Hydroxybutyric acid
22	dTDP
23	2-Oxoglutaric acid
24	Hydroxyproline
25	Betaine
26	CMP

## Sheet: loading
	PC1	PC2	PC3	PC4	PC5	PC6	PC7	PC8	PC9	PC10	PC11	PC12	PC13	PC14	PC15
6-Phosphogluconic acid	0.17859	0.024228	-0.047478	-0.022939	0.027826	0.091942	-0.061851	0.010457	0.031284	0.045558	-0.10205	0.014625	0.076463	0.056245	0.073151
Ribose-5-Phosphate	0.17485	0.0024778	-0.048497	-0.064222	-0.036955	0.13369	0.018162	-0.010309	0.017523	0.029299	0.034724	-0.033363	-0.028664	-0.0078699	-0.0066664
Guanine	0.1742	0.010821	-0.049545	-0.044008	0.064393	0.071841	0.060524	-0.091563	-0.17739	-0.058111	0.016946	-0.0027703	-0.036509	-0.051808	0.059575
2-Oxoisovaleric acid	0.16784	0.047388	0.030619	-0.050131	-0.059886	0.14518	0.041806	-0.011114	0.042294	0.068265	-0.053949	0.031734	-0.029481	-0.034608	0.020011
Sedoheptulose-7-phosphate	0.167	-0.057424	-0.040144	0.18165	0.15507	0.063149	-0.18909	0.037448	0.26992	0.10694	-0.059124	0.026661	-0.089987	-0.059523	-0.040478
Thymidine	0.15792	-0.085914	0.0098901	-0.082548	0.083609	-0.13692	-0.0084604	0.19355	-0.13063	0.024828	0.084107	-0.078173	-0.23375	-0.14288	0.040189
Adenine	0.15618	0.027185	-0.1903	0.044071	-0.074818	-0.025228	0.20221	0.046289	-0.24114	-0.037547	0.021476	0.026279	-0.098234	-0.046477	-0.031515
Adenosine	0.15503	0.054968	0.067589	-0.025713	0.0039945	0.07531	0.062967	-0.0041684	-0.072849	-0.03826	-0.067565	0.051871	-0.06037	-0.088151	0.030758
3-Hydroxybutyric acid	0.15477	0.040444	0.011369	-0.022396	-0.041275	0.10631	-0.058379	-0.02553	-0.0066577	0.03299	0.045219	-0.035211	0.042486	0.0038977	-0.028226
Glyceraldehyde 3-phosphate	0.15384	-0.032337	-0.22593	-0.11973	0.093197	0.12656	0.062419	-0.05166	-0.0055834	0.032663	0.074284	7.8725e-05	-0.066617	-0.0061151	-0.0016015
Ribulose 5-phosphate	0.15384	-0.032337	-0.22593	-0.11973	0.093197	0.12656	0.062419	-0.05166	-0.0055834	0.032663	0.074284	7.8725e-05	-0.066617	-0.0061151	-0.0016015
Carnosine	0.14946	0.059804	0.036656	0.059036	-0.12553	-0.011049	0.19933	0.019138	-0.063595	0.075686	0.0062064	0.0987	0.071901	-0.14026	-0.072582
dTDP	0.1477	-0.0056228	0.016325	-0.084797	-0.098762	0.073414	-0.076793	0.063794	0.06504	0.11383	0.18993	-0.09134	-0.024757	-0.01661	0.041513
Choline	0.14755	-0.090126	-0.021305	0.18128	0.23722	0.10196	0.11264	-0.14224	-0.032081	-0.02219	-0.021085	0.02745	-0.36089	0.12229	0.015618
Hydroxyproline	0.14745	0.013987	0.062033	-0.071286	-0.0072193	-0.056451	0.0019095	0.036512	-0.09762	-0.055403	0.01197	-0.039984	-0.018455	0.052118	0.0754
Anthranilic acid	0.14723	0.020154	0.094397	-0.067859	-0.018688	-0.023026	0.027252	0.028016	-0.055252	-0.021606	0.0021288	-0.0007813	-0.039527	0.0014719	0.036593
Putrescine	0.14613	-0.021602	0.11825	-0.087319	-0.026311	-0.13098	-0.055244	0.049857	-0.047434	0.060862	-0.041988	-0.072038	0.012109	0.086564	-0.87619
CMP	0.1459	0.065123	0.0046133	0.0047296	0.094639	-0.0025179	0.10767	-0.00098303	-0.017063	-0.14713	-0.134	-0.11699	0.13272	0.0086788	0.035423
Cytidine	0.14452	0.010346	0.10024	-0.076785	-0.012061	-0.057851	0.014938	0.047873	-0.093179	-0.020221	0.0073467	-0.032614	-0.033263	0.020147	0.040155
Guanocine	0.14427	0.005583	0.10927	0.0091299	-0.0042119	0.005389	-0.040561	-0.046381	0.06707	0.069118	-0.023108	0.039838	-0.055584	-0.021532	0.014097
Cytosine	0.14387	-0.002076	0.10428	-0.085998	-0.011498	-0.088995	0.0097298	0.060096	-0.095494	-0.027356	0.027326	-0.040013	-0.045478	0.026516	0.018666
Creatinine	0.14368	0.014998	0.097729	-0.069743	-0.01776	-0.046021	0.020526	0.037312	-0.07446	-0.035431	-0.0032584	-0.015529	-0.054873	-0.071002	-0.10682
Glycolic acid	0.14288	-0.005946	0.071759	0.011247	0.019	0.0099692	0.015333	-0.035067	0.10532	0.060255	0.052096	-0.10501	0.026029	0.12807	0.027919
Fluctose 1,6-diphosphate	0.14176	0.078097	-0.093791	0.027381	0.060429	0.064863	-0.055837	0.087698	0.036545	-0.061714	-0.19187	-0.036916	0.03032	-0.12752	0.078855
Spemidine	0.14117	0.0045762	0.10443	-0.083311	-0.015651	-0.079865	0.005876	0.066491	-0.089074	-0.026838	0.013706	-0.029913	-0.050952	0.012566	0.093367
2-Hydroxybutyric acid	0.13881	-0.012068	-0.018642	0.042936	-0.26195	0.0092882	-0.040028	-0.045778	0.071142	0.1254	0.0663	0.039551	0.14872	0.074388	0.056638
Cys	0.13711	0.076836	0.065452	0.052344	-0.12168	-0.012403	0.19917	0.061763	-0.10579	0.065599	0.028331	0.094013	0.087675	-0.13529	0.029745
Ornithine	0.1371	0.050354	0.069153	-0.067146	0.0074597	0.050092	0.0027251	0.005778	-0.028657	-0.020829	0.050714	0.0062624	0.10206	-0.033047	0.047099
Arg	0.13588	-0.071937	0.022951	0.060325	0.23837	0.17457	-0.051479	0.056591	0.064551	-0.015839	-0.049503	0.0080921	0.15249	-0.017813	-0.15137
2-Oxoglutaric acid	0.1357	0.075395	0.032507	-0.033776	-0.064691	0.13023	-0.087301	0.075233	-0.054384	0.081622	-0.030856	0.06439	-0.047419	0.27259	0.053139
cAMP	0.13529	0.026211	0.11659	0.0053233	-0.0014214	0.02646	-0.14403	-0.013125	0.056975	0.15673	0.02053	0.06188	0.036702	0.017564	0.041695
Betaine	0.13319	-0.030794	0.053914	-0.087097	-0.0011727	-0.17701	0.024065	0.13921	-0.024686	-0.13247	0.025122	-0.083891	-0.12765	0.12576	0.10935
GMP	0.12739	-0.033101	-0.066333	0.28062	0.0033566	-0.10916	-0.096948	-0.067235	0.027753	0.05789	0.032238	0.094014	-0.060427	-0.04118	-0.02685
Inosine	0.11981	-0.065446	0.14758	0.083534	0.0025287	-0.011177	-0.16294	-0.081894	0.20811	0.080364	-0.012878	0.040536	-0.07317	0.12956	0.058131
CoA_divalent	0.11762	0.047986	0.09301	-0.020051	-0.01621	0.062751	0.032265	0.043051	-0.012109	0.028476	0.072073	-0.13284	0.02853	-0.0093755	0.074082
Lys	0.11741	-0.054858	-0.024527	0.0050235	0.31308	0.1817	-0.0067816	0.083666	0.042398	-0.0053019	0.035577	0.041401	0.21673	0.017448	-0.022062
Trimesic acid	0.11168	-0.0066106	0.057766	0.13534	-0.069182	-0.23817	0.11734	0.0046628	0.14091	-0.02833	0.19004	0.047338	0.017153	0.012914	0.030858
cGMP	0.11164	0.03215	-0.075719	-0.20207	-0.0039875	-0.12721	-0.013087	-0.15662	0.12132	0.068374	0.11114	0.10096	0.068908	-0.058692	0.05537
NADP	0.10962	0.059428	-0.038194	0.096141	-0.12688	-0.090392	0.11301	0.21469	0.065108	-0.083153	0.039197	-0.027823	0.050331	-0.12603	0.0069313
Uracil	0.10916	-0.0074383	-0.018851	-0.19039	0.087839	-0.28978	0.03095	-0.14579	0.020359	-0.073123	0.091185	0.12205	0.01191	-0.023714	0.010242
Hypoxinthine	0.10807	0.040221	0.21113	0.020484	0.13626	0.10378	0.029717	-0.20289	-0.026533	0.1244	0.07462	0.10698	0.18463	0.013601	0.014872
Glyoxylic acid	0.10517	0.0085219	-0.055677	-0.1817	-0.012412	-0.11153	-0.011642	-0.16883	0.18124	0.049484	0.051839	0.10853	0.04065	-0.059265	0.013355
GSH	-0.10468	0.18778	0.19452	-0.065872	0.19332	-0.024147	0.12512	0.065397	0.048188	0.05657	0.071107	0.061417	0.065886	-0.14411	0.037783
Trp	0.10467	0.067525	0.11388	-0.035817	-0.023589	-0.021659	-0.00048967	0.010381	-0.06259	-0.071294	0.028087	-0.018884	-0.00087903	0.066473	0.044939
CDP	0.094412	0.10864	-0.082249	0.013065	-0.04506	0.071753	-0.09334	-0.023121	0.0023411	-0.033443	-0.013452	-0.098311	-0.0057017	-0.03492	-0.01677
Glucose 6-phosphate	0.091954	-0.067288	-0.066599	0.24819	0.2299	-0.046442	-0.039552	0.12236	-0.1415	-0.082107	-0.13394	0.080821	0.12507	-0.15281	0.049371
UMP	0.08362	0.019793	-0.12962	0.17257	0.00024024	-0.21944	-0.22437	-0.028674	-0.079085	0.037561	-0.20579	0.23692	0.017019	0.10672	-0.0048149
b-Ala	-0.081979	0.18399	0.13654	-0.065017	0.0222	-0.032107	-0.09214	0.08178	0.011338	0.075778	0.058917	-0.003118	0.047584	0.0036516	-0.11065
dATP	0.077306	-0.020805	0.055028	0.0035444	-0.067448	-0.020986	-0.01279	-0.016583	0.05586	0.0080991	0.15848	0.011424	0.024323	-0.17769	0.0086056
Gly	-0.075978	0.19965	0.06103	-0.055887	0.069785	0.0044927	-0.083495	0.024886	-0.015071	0.031647	0.036442	0.066169	0.045832	-0.042078	0.045204
Gluconic acid	0.074986	0.064451	-0.030927	0.13611	-0.22718	0.049604	0.14336	0.10152	0.10152	0.11222	-0.14174	0.11547	-0.29535	0.11001	-0.020112
Dihydroxyacetone phosphate	0.074617	-0.065292	-0.1868	-0.043023	0.071302	0.081891	-0.083618	-0.093919	0.14428	-0.098113	0.083493	-0.016874	-0.082752	-0.024092	-0.076911
Fluctose 6-phosphate	0.06934	0.12381	0.060537	0.0052345	0.051247	-0.082334	-0.089536	0.27674	0.16288	-0.15952	-0.11502	-0.04161	0.15611	0.19139	0.029427
Fumaric acid	0.065117	0.18364	-0.060017	0.088893	-0.18313	-0.02603	0.090875	0.065804	0.032467	-0.098245	0.056061	0.045298	0.1768	0.10066	0.025665
AMP	0.06418	-0.046123	-0.006661	0.3268	0.053734	-0.19219	-0.1512	-0.15479	-0.16488	-0.090706	0.087466	-0.1222	0.09863	-0.027464	0.041712
His	0.062931	0.14193	0.091903	0.035898	0.027248	0.061157	0.020332	-0.036933	-0.034735	-0.13941	-0.045107	0.0027963	0.061244	0.074661	-0.012874
UDP	0.062224	0.13617	-0.14395	0.047453	-0.0014692	0.083901	-0.17776	0.043395	-0.08588	0.07101	0.017857	-0.12895	-0.076076	-0.0037192	-0.032791
Met	0.061833	0.11471	0.12935	0.025577	-0.023488	-0.0022153	0.053504	-0.040681	-0.0074296	-0.15877	0.003823	0.023583	-0.089328	0.15904	0.0096081
Gln	-0.061627	0.17146	-0.018003	-0.056623	0.07589	-0.082319	-0.046973	-0.011602	0.038085	-0.013118	0.11297	0.086983	-0.10472	0.046589	-0.037016
Asp	-0.061166	0.13926	-0.050987	-0.10636	0.10394	-0.039823	0.054363	0.0042457	0.05475	0.059705	0.045202	0.071709	-0.16727	-0.1388	-0.014243
dTMP	0.059473	-0.021237	-0.050967	-0.056351	-0.039765	-0.15806	0.027265	-0.13099	0.11764	-0.01485	-0.058104	0.14263	-0.080639	-0.17194	0.018151
Thr	-0.059343	0.15453	-0.033877	-0.013073	0.15488	-0.074198	-0.06246	0.093157	-0.025764	-0.0029702	0.21641	0.027123	-0.13315	0.073858	-0.043259
NAD	0.058453	0.045254	-0.044309	0.20468	0.10341	-0.28691	0.008162	0.071895	0.24878	0.0004495	0.06015	0.21174	0.0074609	-0.027364	0.0084086
2-Phosphoglyceric acid	0.058228	0.036864	-0.090385	-0.15464	-0.076502	-0.00070905	-0.042978	-0.17889	-0.011445	-0.30866	-0.25467	0.06279	0.063468	-0.068253	-0.044479
3-phosphoglyceric acid	0.057092	0.045624	-0.10632	-0.12471	-0.04293	-0.013898	-0.15476	-0.15211	-0.05737	-0.31952	-0.21179	0.14353	0.054704	-0.08131	-0.085455
Asn	0.05434	0.17621	0.07383	0.026004	-0.044086	0.088831	-0.048023	-0.090328	0.0047922	-0.14288	0.034826	0.091595	0.042649	0.091183	-0.015676
Leu	-0.047619	0.22733	0.10831	0.057913	0.12108	0.093641	-0.0093126	0.00092995	-0.056381	0.030251	-0.032879	0.14501	-0.084965	-0.17669	-0.074063
GDP	0.046264	0.11812	-0.2107	0.13184	0.0040517	-0.081326	0.053124	-0.029812	-0.092084	0.24039	0.13446	-0.13207	0.09238	-0.05441	-0.059446
Succinic acid	0.045666	0.12899	-0.038496	0.046425	0.07485	-0.034626	-0.24617	-0.1143	-0.1608	0.10179	0.18446	-0.1147	0.14574	0.086992	0.072235
dTTP	0.043081	0.11173	-0.10235	-0.062891	0.040655	0.10431	0.21328	-0.065654	0.25243	-0.021161	-0.050844	-0.16205	0.070794	-0.068919	-0.030758
Glucose 1--phosphate	0.040249	0.11354	-0.083977	0.10589	-0.20136	-0.077556	0.024263	-0.0041729	0.11733	-0.12503	0.0052365	0.062393	0.054302	0.058063	-0.0086335
Glu	-0.036499	0.16455	-0.12961	-0.043533	0.078739	-0.016353	-0.027972	-0.065213	0.0061876	-0.048766	-0.028081	0.045209	-0.10485	0.022819	-0.013087
Val	-0.034466	0.19816	0.14422	0.046495	0.06448	0.034261	-0.028314	0.022153	-0.074618	-0.053829	-0.076899	0.057742	-0.042036	-0.092915	0.037331
Pyruvic acid	-0.032535	0.0029283	-0.16789	0.1584	-0.21484	0.17708	-0.11247	0.0079678	0.023537	-0.34904	0.30967	-0.11067	0.011692	-0.1003	-0.056612
Glycerophosphorate	0.030968	0.045762	0.060636	0.13787	0.12189	-0.21697	0.098048	-0.087149	0.023053	-0.098654	-0.11858	-0.48398	0.021703	0.023267	0.021333
CTP	0.030758	0.086238	-0.10504	-0.092029	0.0014196	-0.081034	-0.023718	0.17071	0.15368	-0.033544	-0.055599	-0.12462	-0.058642	0.020447	0.02174
Ile	-0.030752	0.20722	0.14831	0.037579	0.019461	0.055032	-0.0024642	-0.024565	0.025461	0.010091	-0.08464	0.056087	-0.029753	-0.067552	0.064715
Phosphoenolpyruvic acid	0.030496	-0.091795	0.13393	0.0018162	-0.018768	-0.047667	-0.24255	0.15387	0.1482	-0.022786	-0.078993	-0.034036	-0.17452	-0.3368	0.027909
Creatine	0.029422	0.1251	-0.069124	-0.044688	0.01019	0.0093737	-0.11256	0.00047854	-0.014528	-0.065595	0.12312	0.027254	-0.034844	-0.01767	0.033431
ATP	-0.028707	0.13679	-0.0091838	-0.070415	0.064533	-0.12928	0.090428	-0.020517	0.20568	-0.0089898	-0.037744	-0.13203	0.053853	-0.0093768	-0.011348
Ala	-0.024693	0.10523	-0.094723	-0.065434	0.087918	-0.12855	-0.15219	-0.039071	-0.19028	-0.023125	0.12886	-0.020846	-0.082054	0.22155	0.032804
GABA	-0.024468	0.14113	0.0059744	-0.025331	-0.02186	0.01714	-0.0092178	0.043178	0.067802	0.037618	0.056171	-0.087796	-0.11711	0.17217	-0.028671
Malic acid	-0.023872	0.20288	-0.15889	0.043431	-0.11738	-0.023793	0.08746	0.087527	0.0033375	0.08613	-0.025298	0.084697	0.0072952	0.026384	-0.042833
Pro	-0.022596	0.13232	-0.13139	-0.069481	0.060999	-0.014032	-0.062594	-0.030609	-0.025972	-0.077403	0.11108	0.10466	-0.18147	-0.022239	-0.032541
Ser	-0.020729	0.2084	-0.033263	0.027013	0.074965	0.079029	-0.0019024	-0.072813	0.074527	-0.024303	0.054738	0.04771	-0.00068901	0.025021	-0.067839
Tyr	-0.017617	0.19101	0.10495	0.054143	-0.0078401	0.063018	-0.0074541	-0.036712	-0.0039735	-0.036194	-0.02348	0.0034384	-0.092694	-0.047786	0.039876
GSSG_divalent	0.016675	0.028052	-0.013294	-0.20047	-0.087745	-0.21561	-0.10499	-0.24932	-0.10869	0.25977	-0.31545	-0.13433	0.011699	0.007909	0.11242
ADP	-0.014423	0.21289	-0.14976	0.14943	0.001104	-0.037756	0.09182	-0.014453	-0.21548	0.26458	-0.11827	-0.072385	0.020155	-0.19392	-0.058668
GTP	0.013708	0.10301	-0.13377	-0.057745	0.13176	-0.069467	0.10557	0.0049109	0.15594	0.012966	-0.033508	-0.22014	0.073426	-0.088508	-0.018781
Isocitric acid	0.01302	0.0030405	0.10153	-0.092299	-0.17473	0.02047	-0.33703	0.11488	-0.061538	-0.039612	0.098195	-0.11553	-0.014683	-0.35007	0.0035081
Phe	0.010104	0.17894	0.10461	0.060672	0.0039336	0.027348	-0.059003	-0.054433	-0.063107	-0.084279	-0.024538	0.017447	-0.028454	0.0057317	-0.018407
UTP	0.0050553	0.11295	-0.16436	-0.10149	0.082242	-0.04614	-0.12283	0.090124	0.064073	0.080419	0.014244	-0.098808	0.089682	0.0031777	0.084801
Lactic acid	-0.0037646	0.00017805	-0.081417	-0.036516	-0.14552	0.043174	-0.12116	-0.02867	0.003372	0.13435	0.0036131	0.096862	0.22861	-0.012608	-0.0099285
IMP	-0.0024407	0.05734	0.20211	0.17096	-0.089823	0.032596	0.04437	-0.48356	0.11172	-0.051408	0.11386	-0.19986	-0.13632	-0.11328	-0.057456
Citric acid	-0.0017242	0.14756	-0.050871	0.075278	-0.15327	0.11967	-0.14523	0.0067818	0.11505	0.10713	-0.25188	-0.18888	-0.17965	0.035525	0.03732

## Sheet: PC1_50%_metabolites
6-Phosphogluconic acid
Ribose-5-Phosphate
Guanine
2-Oxoisovaleric acid
Sedoheptulose-7-phosphate
Thymidine
Adenine
Adenosine
3-Hydroxybutyric acid
Glyceraldehyde 3-phosphate
Ribulose 5-phosphate
Carnosine
dTDP
Choline
Hydroxyproline
Anthranilic acid
Putrescine
CMP
Cytidine
Guanocine
Cytosine
Creatinine
Glycolic acid
Fluctose 1,6-diphosphate
Spemidine
2-Hydroxybutyric acid
Cystein
Ornithine

## Sheet: Pathway results
Pathway	Total	Expected	Hits	Raw p	-LOG10(Raw p)	Holm adjust	FDR	Impact	-LOG10(Raw p)*Impact
Pantothenate and CoA biosynthesis	19	0.31871	2	0.038846	1.41065	1	0.54384	0	0
Synthesis and degradation of ketone bodies	5	0.083871	1	0.081205	1.09042	1	0.85266	0	0
Glycine, serine and threonine metabolism	33	0.55355	2	0.10402	0.982883	1	0.88791	0	0
Thiamine metabolism	7	0.11742	1	0.11188	0.951248	1	0.88791	0	0
Valine, leucine and isoleucine biosynthesis	8	0.13419	1	0.12684	0.896744	1	0.88791	0	0
Taurine and hypotaurine metabolism	8	0.13419	1	0.12684	0.896744	1	0.88791	0	0
Butanoate metabolism	15	0.25161	1	0.22501	0.647798	1	1	0	0
Pentose and glucuronate interconversions	18	0.30194	1	0.26376	0.578791	1	1	0	0
Propanoate metabolism	23	0.38581	1	0.32422	0.48916	1	1	0	0
Fatty acid degradation	39	0.65419	1	0.48729	0.312213	1	1	0	0
Aminoacyl-tRNA biosynthesis	48	0.80516	1	0.56162	0.250557	1	1	0	0
Tryptophan metabolism	41	0.68774	1	0.50478	0.296898	1	1	0.00202	0.000599734
Valine, leucine and isoleucine degradation	40	0.67097	1	0.49611	0.304422	1	1	0.01084	0.00329993
Glycerophospholipid metabolism	36	0.60387	1	0.45992	0.337318	1	1	0.02582	0.00870954
Purine metabolism	65	1.0903	4	0.021006	1.67766	1	0.3529	0.01933	0.0324291
Cysteine and methionine metabolism	33	0.55355	1	0.43115	0.365372	1	1	0.09592	0.0350464
Arginine biosynthesis	14	0.23484	1	0.21167	0.674341	1	1	0.06091	0.0410741
Glutathione metabolism	28	0.46968	4	0.00097058	3.01297	0.081529	0.081529	0.01781	0.053661
Histidine metabolism	16	0.26839	1	0.23814	0.623168	1	1	0.09016	0.0561848
beta-Alanine metabolism	21	0.35226	2	0.046739	1.33032	1	0.56087	0.05597	0.074458
Pyrimidine metabolism	39	0.65419	4	0.0034372	2.4638	0.28185	0.096242	0.07105	0.175053
Pentose phosphate pathway	22	0.36903	3	0.0052261	2.28182	0.42331	0.10975	0.27819	0.63478
Arginine and proline metabolism	38	0.63742	4	0.0031202	2.50582	0.25898	0.096242	0.31431	0.787604
