# Supplementary material for: Metabolome Shift in Both Metastatic Breast Cancer Cells and Astrocytes Which May Contribute to the Tumor Microenvironment
Source: Int J Mol Sci. 2021 Jul 11;22(14):7430. doi: 10.3390/ijms22147430 (PMC8308096; doi:10.3390/ijms22147430)
Supplement: Supplementary file 1 [file ijms-22-07430-s001.zip › Table S7_MDA231 pathway_results.xlsx]

## Sheet: 1 vs 2
Pathway	Total Cmpd	Hits	Raw p	-LOG10(Raw p)	Holm adjust	FDR	Impact	-LOG10(Raw p)*Impact
Terpenoid backbone biosynthesis	33	2	0.035949	1.44431	1	0.46564	0	0
Pentose and glucuronate interconversions	53	3	0.036504	1.43766	1	0.46564	0	0
Cyanoamino acid metabolism	16	3	0.088941	1.0509	1	0.46564	0	0
Biotin metabolism	11	1	0.19587	0.708032	1	0.50687	0	0
Selenoamino acid metabolism	22	1	0.26969	0.569135	1	0.50687	0	0
Porphyrin and chlorophyll metabolism	104	1	0.2954	0.52959	1	0.50687	0	0
D-Arginine and D-ornithine metabolism	8	2	0.3552	0.449527	1	0.52773	0	0
Sphingolipid metabolism	25	1	0.39268	0.405961	1	0.53121	0	0
Ubiquinone and other terpenoid-quinone biosynthesis	36	1	0.44611	0.350558	1	0.56295	0	0
Thiamine metabolism	24	2	0.50479	0.296889	1	0.57721	0	0
Caffeine metabolism	21	1	0.65143	0.186132	1	0.70461	0	0
Synthesis and degradation of ketone bodies	6	1	0.8277	0.082127	1	0.84362	0	0
Starch and sucrose metabolism	50	1	0.35749	0.446736	1	0.52773	0.00031	0.000138488
Nicotinate and nicotinamide metabolism	44	6	0.1868	0.728623	1	0.50687	0.0015	0.00109293
Tryptophan metabolism	79	3	0.98281	0.00753043	1	0.98281	0.16807	0.00126564
Galactose metabolism	41	2	0.69304	0.159242	1	0.72022	0.01286	0.00204785
Nitrogen metabolism	39	10	0.2847	0.545613	1	0.50687	0.0083	0.00452858
Inositol phosphate metabolism	39	3	0.35846	0.445559	1	0.52773	0.01203	0.00536008
Methane metabolism	34	2	0.39277	0.405862	1	0.53121	0.01751	0.00710664
Glycerolipid metabolism	32	2	0.074975	1.12508	1	0.46564	0.00714	0.0080331
Fatty acid metabolism	50	1	0.58192	0.235137	1	0.64253	0.03742	0.00879882
Fructose and mannose metabolism	48	2	0.69304	0.159242	1	0.72022	0.05774	0.00919462
Sulfur metabolism	18	2	0.40091	0.396953	1	0.53121	0.03307	0.0131272
Tyrosine metabolism	76	4	0.48059	0.318225	1	0.56603	0.04724	0.015033
Ascorbate and aldarate metabolism	45	2	0.051091	1.29166	1	0.46564	0.01617	0.0208861
Phenylalanine, tyrosine and tryptophan biosynthesis	27	5	0.47702	0.321463	1	0.56603	0.0818	0.0262957
Glycerophospholipid metabolism	39	3	0.28337	0.547646	1	0.50687	0.05375	0.029436
Taurine and hypotaurine metabolism	20	3	0.26587	0.575331	1	0.50687	0.05395	0.0310391
Valine, leucine and isoleucine degradation	40	4	0.10336	0.985647	1	0.46564	0.03889	0.0383318
Phenylalanine metabolism	45	5	0.47072	0.327237	1	0.56603	0.11906	0.0389609
Propanoate metabolism	35	5	0.30527	0.515316	1	0.50687	0.08634	0.0444924
Vitamin B6 metabolism	32	3	0.05103	1.29217	1	0.46564	0.03828	0.0494644
Cysteine and methionine metabolism	56	7	0.51187	0.29084	1	0.57721	0.20072	0.0583775
Butanoate metabolism	40	7	0.29593	0.528811	1	0.50687	0.13608	0.0719606
D-Glutamine and D-glutamate metabolism	11	3	0.28916	0.538862	1	0.50687	0.13904	0.0749233
Histidine metabolism	44	5	0.28989	0.537767	1	0.50687	0.14319	0.0770028
Lysine degradation	47	1	0.19587	0.708032	1	0.50687	0.14675	0.103904
Lysine biosynthesis	32	3	0.086996	1.0605	1	0.46564	0.09993	0.105976
Glyoxylate and dicarboxylate metabolism	50	8	0.38177	0.418198	1	0.53121	0.28749	0.120228
Aminoacyl-tRNA biosynthesis	75	18	0.27188	0.565623	1	0.50687	0.22536	0.127469
Citrate cycle (TCA cycle)	20	8	0.43396	0.36255	1	0.56097	0.37245	0.135032
Pantothenate and CoA biosynthesis	27	8	0.1097	0.959793	1	0.46564	0.15506	0.148826
Glutathione metabolism	38	8	0.32939	0.48229	1	0.52773	0.31279	0.150855
Valine, leucine and isoleucine biosynthesis	27	5	0.095709	1.01905	1	0.46564	0.14998	0.152837
Glycolysis or Gluconeogenesis	31	5	0.30596	0.514335	1	0.50687	0.29957	0.154079
Glycine, serine and threonine metabolism	48	9	0.10034	0.998526	1	0.46564	0.16012	0.159884
Pyruvate metabolism	32	5	0.30604	0.514222	1	0.50687	0.3201	0.164602
Purine metabolism	92	18	0.28497	0.545201	1	0.50687	0.33144	0.180701
Pyrimidine metabolism	60	15	0.30495	0.515771	1	0.50687	0.46832	0.241546
beta-Alanine metabolism	28	7	0.11421	0.942296	1	0.46564	0.34647	0.326477
Arginine and proline metabolism	77	15	0.27304	0.563774	1	0.50687	0.59925	0.337841
Pentose phosphate pathway	32	5	0.094675	1.02376	1	0.46564	0.42526	0.435366
Ala, Asp and Glu metabolism	24	10	0.28369	0.547156	1	0.50687	0.8566	0.468694

## Sheet: 1 vs 3
Pathway	Total Cmpd	Hits	Raw p	-LOG10(Raw p)	Holm adjust	FDR	Impact	-LOG10(Raw p)*Impact
Cyanoamino acid metabolism	16	3	0.0022334	2.65103	0.096036	0.010761	0	0
D-Arginine and D-ornithine metabolism	8	2	0.0049872	2.30214	0.18951	0.015604	0	0
Thiamine metabolism	24	2	0.005005	2.3006	0.18951	0.015604	0	0
Ubiquinone and other terpenoid-quinone biosynthesis	36	1	0.0056141	2.25072	0.20211	0.01653	0	0
Biotin metabolism	11	1	0.0096395	2.01595	0.32774	0.024328	0	0
Pentose and glucuronate interconversions	53	3	0.029064	1.53664	0.798	0.052159	0	0
Synthesis and degradation of ketone bodies	6	1	0.046043	1.33684	0.88315	0.066834	0	0
Sphingolipid metabolism	25	1	0.047918	1.3195	0.88315	0.066834	0	0
Porphyrin and chlorophyll metabolism	104	1	0.054989	1.25972	0.88315	0.07286	0	0
Terpenoid backbone biosynthesis	33	2	0.087166	1.05965	0.88315	0.10266	0	0
Caffeine metabolism	21	1	0.13191	0.879722	0.9902	0.14875	0	0
Selenoamino acid metabolism	22	1	0.56311	0.249407	1	0.56311	0	0
Starch and sucrose metabolism	50	1	0.076667	1.11539	0.88315	0.092349	0.00031	0.000345771
Nicotinate and nicotinamide metabolism	44	6	0.00074023	3.13063	0.037012	0.00608	0.0015	0.00469595
Glycerolipid metabolism	32	2	0.058904	1.22986	0.88315	0.074331	0.00714	0.00878117
Fatty acid metabolism	50	1	0.46839	0.329392	1	0.48676	0.03742	0.0123259
Nitrogen metabolism	39	10	0.029801	1.52577	0.798	0.052159	0.0083	0.0126639
Inositol phosphate metabolism	39	3	0.071823	1.14374	0.88315	0.088526	0.01203	0.0137591
Taurine and hypotaurine metabolism	20	3	0.55421	0.256326	1	0.56311	0.05395	0.0138288
Ascorbate and aldarate metabolism	45	2	0.12378	0.90735	0.9902	0.14261	0.01617	0.0146718
Methane metabolism	34	2	0.039453	1.40392	0.82852	0.063364	0.01751	0.0245826
Galactose metabolism	41	2	0.0009673	3.01444	0.046431	0.00608	0.01286	0.0387657
Sulfur metabolism	18	2	0.046387	1.3336	0.88315	0.066834	0.03307	0.0441023
Propanoate metabolism	35	5	0.28946	0.538411	1	0.31572	0.08634	0.0464864
Vitamin B6 metabolism	32	3	0.047572	1.32265	0.88315	0.066834	0.03828	0.050631
Tyrosine metabolism	76	4	0.022827	1.64155	0.66198	0.048393	0.04724	0.0775469
Valine, leucine and isoleucine degradation	40	4	0.0041199	2.38511	0.16068	0.014557	0.03889	0.0927571
Glycerophospholipid metabolism	39	3	0.01773	1.75129	0.5319	0.039154	0.05375	0.0941319
Glycolysis or Gluconeogenesis	31	5	0.29784	0.526017	1	0.31572	0.29957	0.157579
Phenylalanine, tyrosine and tryptophan biosynthesis	27	5	0.011539	1.93783	0.36923	0.027797	0.0818	0.158515
Pyruvate metabolism	32	5	0.2974	0.526659	1	0.31572	0.3201	0.168584
Butanoate metabolism	40	7	0.054777	1.2614	0.88315	0.07286	0.13608	0.171652
Fructose and mannose metabolism	48	2	0.0009673	3.01444	0.046431	0.00608	0.05774	0.174054
Phenylalanine metabolism	45	5	0.0285	1.54516	0.798	0.052159	0.11906	0.183966
Histidine metabolism	44	5	0.044157	1.355	0.88315	0.066834	0.14319	0.194023
D-Glutamine and D-glutamate metabolism	11	3	0.035557	1.44907	0.798	0.058891	0.13904	0.201479
Tryptophan metabolism	79	3	0.056742	1.2461	0.88315	0.073349	0.16807	0.209431
Lysine degradation	47	1	0.0096395	2.01595	0.32774	0.024328	0.14675	0.29584
Lysine biosynthesis	32	3	0.0010769	2.96782	0.04846	0.00608	0.09993	0.296575
Aminoacyl-tRNA biosynthesis	75	18	0.029179	1.53493	0.798	0.052159	0.22536	0.345912
Valine, leucine and isoleucine biosynthesis	27	5	0.0039936	2.39864	0.15974	0.014557	0.14998	0.359747
Glycine, serine and threonine metabolism	48	9	0.00076934	3.11388	0.037698	0.00608	0.16012	0.498595
Pantothenate and CoA biosynthesis	27	8	0.00017901	3.74712	0.0093084	0.0047437	0.15506	0.581029
Cysteine and methionine metabolism	56	7	0.0010331	2.98586	0.047521	0.00608	0.20072	0.599321
Purine metabolism	92	18	0.0079283	2.10082	0.27749	0.022116	0.33144	0.696296
Pentose phosphate pathway	32	5	0.014045	1.85248	0.43539	0.032364	0.42526	0.787785
Glutathione metabolism	38	8	0.0027589	2.55926	0.11587	0.012185	0.31279	0.800512
Glyoxylate and dicarboxylate metabolism	50	8	0.00065798	3.18179	0.033557	0.00608	0.28749	0.914732
Arginine and proline metabolism	77	15	0.029731	1.52679	0.798	0.052159	0.59925	0.914929
Citrate cycle (TCA cycle)	20	8	0.0011472	2.94036	0.050475	0.00608	0.37245	1.09514
Pyrimidine metabolism	60	15	0.0030018	2.52262	0.12307	0.012238	0.46832	1.18139
Ala, Asp and Glu metabolism	24	10	0.030508	1.51559	0.798	0.052159	0.8566	1.29825
beta-Alanine metabolism	28	7	4.3954e-05	4.357	0.0023296	0.0023296	0.34647	1.50957

## Sheet: 3 vs 4
	Total Cmpd	Hits	Raw p	-LOG10(Raw p)	Holm adjust	FDR	Impact	-LOG10(Raw p)*Impact
Pentose and glucuronate interconversions	53	3	0.039017	1.40875	1	0.26982	0	0
Ubiquinone and other terpenoid-quinone biosynthesis	36	1	0.053699	1.27003	1	0.26982	0	0
Terpenoid backbone biosynthesis	33	2	0.06973	1.15658	1	0.26982	0	0
Selenoamino acid metabolism	22	1	0.096443	1.01573	1	0.26982	0	0
Porphyrin and chlorophyll metabolism	104	1	0.1083	0.965372	1	0.26982	0	0
Thiamine metabolism	24	2	0.15346	0.814005	1	0.30123	0	0
D-Arginine and D-ornithine metabolism	8	2	0.23039	0.637536	1	0.40703	0	0
Caffeine metabolism	21	1	0.30274	0.51893	1	0.48622	0	0
Biotin metabolism	11	1	0.4468	0.349887	1	0.6072	0	0
Cyanoamino acid metabolism	16	3	0.60474	0.218431	1	0.71456	0	0
Synthesis and degradation of ketone bodies	6	1	0.79962	0.0971164	1	0.815	0	0
Sphingolipid metabolism	25	1	0.83235	0.079694	1	0.83235	0	0
Starch and sucrose metabolism	50	1	0.73804	0.13192	1	0.76817	0.00031	4.08952e-05
Nicotinate and nicotinamide metabolism	44	6	0.72727	0.138304	1	0.76817	0.0015	0.000207456
Inositol phosphate metabolism	39	3	0.65499	0.183765	1	0.73861	0.01203	0.0022107
Methane metabolism	34	2	0.73918	0.13125	1	0.76817	0.01751	0.00229818
Sulfur metabolism	18	2	0.63589	0.196618	1	0.73266	0.03307	0.00650216
Nitrogen metabolism	39	10	0.13236	0.878243	1	0.26982	0.0083	0.00728942
Glycerolipid metabolism	32	2	0.016113	1.79282	0.80564	0.19697	0.00714	0.0128008
Glycerophospholipid metabolism	39	3	0.49686	0.303766	1	0.65834	0.05375	0.0163274
Ascorbate and aldarate metabolism	45	2	0.084923	1.07097	1	0.26982	0.01617	0.0173177
Lysine biosynthesis	32	3	0.6067	0.217026	1	0.71456	0.09993	0.0216874
Fatty acid metabolism	50	1	0.23888	0.62182	1	0.40842	0.03742	0.0232685
Galactose metabolism	41	2	0.0036444	2.43837	0.19316	0.096578	0.01286	0.0313575
Glycine, serine and threonine metabolism	48	9	0.59318	0.226814	1	0.71456	0.16012	0.0363174
Propanoate metabolism	35	5	0.36251	0.44068	1	0.51955	0.08634	0.0380483
Pantothenate and CoA biosynthesis	27	8	0.54716	0.261886	1	0.70731	0.15506	0.040608
Vitamin B6 metabolism	32	3	0.08129	1.08996	1	0.26982	0.03828	0.0417238
Valine, leucine and isoleucine degradation	40	4	0.056965	1.24439	1	0.26982	0.03889	0.0483944
Lysine degradation	47	1	0.4468	0.349887	1	0.6072	0.14675	0.0513459
Purine metabolism	92	18	0.67344	0.171701	1	0.74359	0.33144	0.0569086
Phenylalanine, tyrosine and tryptophan biosynthesis	27	5	0.19221	0.716224	1	0.35834	0.0818	0.0585871
Taurine and hypotaurine metabolism	20	3	0.080483	1.0943	1	0.26982	0.05395	0.0590373
Tyrosine metabolism	76	4	0.055661	1.25445	1	0.26982	0.04724	0.0592602
Tryptophan metabolism	79	3	0.33388	0.47641	1	0.51955	0.16807	0.0800702
beta-Alanine metabolism	28	7	0.56922	0.24472	1	0.71456	0.34647	0.0847881
Histidine metabolism	44	5	0.12422	0.905808	1	0.26982	0.14319	0.129703
D-Glutamine and D-glutamate metabolism	11	3	0.11626	0.93457	1	0.26982	0.13904	0.129943
Butanoate metabolism	40	7	0.10813	0.966054	1	0.26982	0.13608	0.131461
Glycolysis or Gluconeogenesis	31	5	0.3627	0.440452	1	0.51955	0.29957	0.131946
Fructose and mannose metabolism	48	2	0.0036444	2.43837	0.19316	0.096578	0.05774	0.140792
Pyruvate metabolism	32	5	0.36209	0.441183	1	0.51955	0.3201	0.141223
Phenylalanine metabolism	45	5	0.049889	1.302	1	0.26982	0.11906	0.155016
Cysteine and methionine metabolism	56	7	0.11415	0.942524	1	0.26982	0.20072	0.189183
Valine, leucine and isoleucine biosynthesis	27	5	0.053986	1.26772	1	0.26982	0.14998	0.190132
Aminoacyl-tRNA biosynthesis	75	18	0.12906	0.889208	1	0.26982	0.22536	0.200392
Glyoxylate and dicarboxylate metabolism	50	8	0.19607	0.707589	1	0.35834	0.28749	0.203425
Pyrimidine metabolism	60	15	0.28291	0.548352	1	0.46857	0.46832	0.256804
Pentose phosphate pathway	32	5	0.10985	0.9592	1	0.26982	0.42526	0.407909
Arginine and proline metabolism	77	15	0.12998	0.886123	1	0.26982	0.59925	0.531009
Glutathione metabolism	38	8	0.018582	1.73091	0.91054	0.19697	0.31279	0.541411
Citrate cycle (TCA cycle)	20	8	0.011326	1.94592	0.57763	0.19697	0.37245	0.724759
Ala, Asp and Glu metabolism	24	10	0.13133	0.881636	1	0.26982	0.8566	0.755209

## Sheet: 1 vs 4
Pathway	Total Cmpd	Hits	Raw p	-LOG10(Raw p)	Holm adjust	FDR	Impact	-LOG10(Raw p)*Impact
Biotin metabolism	11	1	0.00043276	3.36375	0.022936	0.011468	0	0
D-Arginine and D-ornithine metabolism	8	2	0.007797	2.10807	0.36916	0.059035	0	0
Thiamine metabolism	24	2	0.023857	1.62238	1	0.069347	0	0
Porphyrin and chlorophyll metabolism	104	1	0.026008	1.58489	1	0.069347	0	0
Ubiquinone and other terpenoid-quinone biosynthesis	36	1	0.040862	1.38868	1	0.085217	0	0
Sphingolipid metabolism	25	1	0.082715	1.08242	1	0.12178	0	0
Selenoamino acid metabolism	22	1	0.092877	1.03209	1	0.12954	0	0
Pentose and glucuronate interconversions	53	3	0.11197	0.950898	1	0.15216	0	0
Terpenoid backbone biosynthesis	33	2	0.11561	0.937005	1	0.15319	0	0
Cyanoamino acid metabolism	16	3	0.13897	0.857079	1	0.17129	0	0
Synthesis and degradation of ketone bodies	6	1	0.20237	0.693854	1	0.23835	0	0
Caffeine metabolism	21	1	0.79348	0.100464	1	0.79348	0	0
Starch and sucrose metabolism	50	1	0.049238	1.3077	1	0.0932	0.00031	0.000405387
Nicotinate and nicotinamide metabolism	44	6	0.14804	0.829621	1	0.17832	0.0015	0.00124443
Glycerolipid metabolism	32	2	0.078164	1.10699	1	0.12178	0.00714	0.00790393
Nitrogen metabolism	39	10	0.028579	1.54395	1	0.069347	0.0083	0.0128148
Inositol phosphate metabolism	39	3	0.048674	1.3127	1	0.0932	0.01203	0.0157918
Ascorbate and aldarate metabolism	45	2	0.081181	1.09055	1	0.12178	0.01617	0.0176341
Fatty acid metabolism	50	1	0.32929	0.482421	1	0.35617	0.03742	0.0180522
Methane metabolism	34	2	0.07857	1.10474	1	0.12178	0.01751	0.0193441
Propanoate metabolism	35	5	0.57755	0.23841	1	0.61221	0.08634	0.0205844
Galactose metabolism	41	2	0.0075338	2.12299	0.36916	0.059035	0.01286	0.0273016
Tyrosine metabolism	76	4	0.24527	0.610356	1	0.27658	0.04724	0.0288332
Sulfur metabolism	18	2	0.077702	1.10957	1	0.12178	0.03307	0.0366934
Glycolysis or Gluconeogenesis	31	5	0.69252	0.159568	1	0.70584	0.29957	0.0478017
Taurine and hypotaurine metabolism	20	3	0.088601	1.05256	1	0.12691	0.05395	0.0567857
Valine, leucine and isoleucine degradation	40	4	0.033759	1.47161	1	0.07455	0.03889	0.0572309
Pyruvate metabolism	32	5	0.64536	0.190198	1	0.67067	0.3201	0.0608824
Vitamin B6 metabolism	32	3	0.017069	1.76779	0.78519	0.069347	0.03828	0.0676711
Phenylalanine metabolism	45	5	0.25412	0.594961	1	0.28059	0.11906	0.0708361
Glycerophospholipid metabolism	39	3	0.027773	1.55638	1	0.069347	0.05375	0.0836553
Lysine biosynthesis	32	3	0.12707	0.895957	1	0.16426	0.09993	0.089533
Phenylalanine, tyrosine and tryptophan biosynthesis	27	5	0.064968	1.1873	1	0.11873	0.0818	0.0971212
Tryptophan metabolism	79	3	0.23626	0.62661	1	0.27221	0.16807	0.105314
Fructose and mannose metabolism	48	2	0.0075338	2.12299	0.36916	0.059035	0.05774	0.122581
Glycine, serine and threonine metabolism	48	9	0.13684	0.863787	1	0.17129	0.16012	0.13831
Pantothenate and CoA biosynthesis	27	8	0.078663	1.10423	1	0.12178	0.15506	0.171222
Butanoate metabolism	40	7	0.025998	1.58506	1	0.069347	0.13608	0.215695
D-Glutamine and D-glutamate metabolism	11	3	0.026161	1.58235	1	0.069347	0.13904	0.220009
Histidine metabolism	44	5	0.0287	1.54212	1	0.069347	0.14319	0.220816
Valine, leucine and isoleucine biosynthesis	27	5	0.021624	1.66506	0.97307	0.069347	0.14998	0.249726
Cysteine and methionine metabolism	56	7	0.031217	1.50561	1	0.071935	0.20072	0.302206
Aminoacyl-tRNA biosynthesis	75	18	0.028777	1.54095	1	0.069347	0.22536	0.34727
beta-Alanine metabolism	28	7	0.078831	1.1033	1	0.12178	0.34647	0.382261
Glyoxylate and dicarboxylate metabolism	50	8	0.026192	1.58183	1	0.069347	0.28749	0.454761
Purine metabolism	92	18	0.041804	1.37878	1	0.085217	0.33144	0.456984
Lysine degradation	47	1	0.00043276	3.36375	0.022936	0.011468	0.14675	0.493631
Glutathione metabolism	38	8	0.025796	1.58845	1	0.069347	0.31279	0.496851
Pyrimidine metabolism	60	15	0.024344	1.61361	1	0.069347	0.46832	0.755685
Arginine and proline metabolism	77	15	0.028786	1.54082	1	0.069347	0.59925	0.923336
Pentose phosphate pathway	32	5	0.0044016	2.35639	0.22008	0.058321	0.42526	1.00208
Citrate cycle (TCA cycle)	20	8	0.00068784	3.16251	0.03508	0.012152	0.37245	1.17788
Ala, Asp, and Glu metabolism	24	10	0.028733	1.54162	1	0.069347	0.8566	1.32055

## Sheet: 4 vs 5
	Total Cmpd	Hits	Raw p	-LOG10(Raw p)	Holm adjust	FDR	Impact	-LOG10(Raw p)*Impact
Ubiquinone and other terpenoid-quinone biosynthesis	36	1	0.0046772	2.33001	0.24789	0.13475	0	0
Thiamine metabolism	24	2	0.012729	1.89521	0.63646	0.13475	0	0
Sphingolipid metabolism	25	1	0.047593	1.32246	1	0.19288	0	0
Selenoamino acid metabolism	22	1	0.054066	1.26708	1	0.19288	0	0
D-Arginine and D-ornithine metabolism	8	2	0.11999	0.920855	1	0.25782	0	0
Porphyrin and chlorophyll metabolism	104	1	0.12564	0.900872	1	0.25782	0	0
Synthesis and degradation of ketone bodies	6	1	0.15237	0.817101	1	0.25782	0	0
Cyanoamino acid metabolism	16	3	0.32504	0.488063	1	0.39787	0	0
Pentose and glucuronate interconversions	53	3	0.41791	0.378917	1	0.45328	0	0
Terpenoid backbone biosynthesis	33	2	0.45969	0.337535	1	0.48727	0	0
Caffeine metabolism	21	1	0.67563	0.170291	1	0.70213	0	0
Biotin metabolism	11	1	0.89107	0.0500882	1	0.89107	0	0
Starch and sucrose metabolism	50	1	0.41907	0.377713	1	0.45328	0.00031	0.000180088
Nicotinate and nicotinamide metabolism	44	6	0.3303	0.481091	1	0.39787	0.0015	0.00100455
Glycerolipid metabolism	32	2	0.09233	1.03466	1	0.25782	0.00714	0.00648076
Inositol phosphate metabolism	39	3	0.41052	0.386666	1	0.45328	0.01203	0.00709144
Nitrogen metabolism	39	10	0.14055	0.852169	1	0.25782	0.0083	0.00713344
Galactose metabolism	41	2	0.15566	0.807823	1	0.25782	0.01286	0.0108582
Ascorbate and aldarate metabolism	45	2	0.23708	0.625105	1	0.35901	0.01617	0.0123364
Lysine degradation	47	1	0.89107	0.0500882	1	0.89107	0.14675	0.0159855
Methane metabolism	34	2	0.047474	1.32354	1	0.19288	0.01751	0.0166787
Vitamin B6 metabolism	32	3	0.2277	0.642637	1	0.35494	0.03828	0.0295636
Sulfur metabolism	18	2	0.027291	1.56398	1	0.16071	0.03307	0.0321675
Fatty acid metabolism	50	1	0.12867	0.890523	1	0.25782	0.03742	0.0326052
Glycerophospholipid metabolism	39	3	0.29394	0.531741	1	0.39787	0.05375	0.0379507
Valine, leucine and isoleucine degradation	40	4	0.010646	1.97281	0.54292	0.13475	0.03889	0.038476
Tyrosine metabolism	76	4	0.022019	1.6572	1	0.14587	0.04724	0.0461998
Fructose and mannose metabolism	48	2	0.15566	0.807823	1	0.25782	0.05774	0.0487522
Taurine and hypotaurine metabolism	20	3	0.052927	1.27632	1	0.19288	0.05395	0.0510946
Propanoate metabolism	35	5	0.31658	0.499517	1	0.39787	0.08634	0.0590065
Lysine biosynthesis	32	3	0.34039	0.468023	1	0.4009	0.09993	0.0659148
Phenylalanine, tyrosine and tryptophan biosynthesis	27	5	0.017611	1.75422	0.84535	0.13475	0.0818	0.0803594
Pantothenate and CoA biosynthesis	27	8	0.30284	0.518787	1	0.39787	0.15506	0.108102
Glycine, serine and threonine metabolism	48	9	0.3137	0.503485	1	0.39787	0.16012	0.10989
Phenylalanine metabolism	45	5	0.017797	1.74965	0.84535	0.13475	0.11906	0.116941
Butanoate metabolism	40	7	0.12434	0.905389	1	0.25782	0.13608	0.11916
D-Glutamine and D-glutamate metabolism	11	3	0.12608	0.899354	1	0.25782	0.13904	0.12151
Histidine metabolism	44	5	0.14195	0.847865	1	0.25782	0.14319	0.122864
Cysteine and methionine metabolism	56	7	0.35083	0.454903	1	0.40422	0.20072	0.130301
Valine, leucine and isoleucine biosynthesis	27	5	0.016397	1.78524	0.80343	0.13475	0.14998	0.147521
Tryptophan metabolism	79	3	0.087304	1.05897	1	0.25782	0.16807	0.153397
Aminoacyl-tRNA biosynthesis	75	18	0.13608	0.866206	1	0.25782	0.22536	0.194693
Glycolysis or Gluconeogenesis	31	5	0.31686	0.499133	1	0.39787	0.29957	0.204648
Pyruvate metabolism	32	5	0.31664	0.499434	1	0.39787	0.3201	0.218744
beta-Alanine metabolism	28	7	0.30129	0.521015	1	0.39787	0.34647	0.242082
Glutathione metabolism	38	8	0.19737	0.704719	1	0.31699	0.31279	0.251055
Glyoxylate and dicarboxylate metabolism	50	8	0.054587	1.26291	1	0.19288	0.28749	0.271797
Purine metabolism	92	18	0.12327	0.909143	1	0.25782	0.33144	0.290583
Citrate cycle (TCA cycle)	20	8	0.006216	2.20649	0.32323	0.13475	0.37245	0.370135
Pentose phosphate pathway	32	5	0.044101	1.35555	1	0.19288	0.42526	0.406506
Pyrimidine metabolism	60	15	0.10451	0.980842	1	0.25782	0.46832	0.419376
Arginine and proline metabolism	77	15	0.13896	0.85711	1	0.25782	0.59925	0.515978
Ala, Asp and Glu metabolism	24	10	0.13852	0.858488	1	0.25782	0.8566	0.737944
